# Supplementary material
Source: PubMed Central journal article supplement (PMC6777860)
Supplement: NIHMS1538374-supplement-Supplemental_Publication_Material.pdf [file NIHMS1538374-supplement-Supplemental_Publication_Material.pdf]

## **SUPPLEMENTAL MATERIAL**

### **Apolipoprotein A-I Promotes Atherosclerosis Regression in Diabetic Mice by Suppressing Myelopoiesis and Plaque Inflammation**

Tessa J. Barrett, PhD, Emilie Distel, PhD, Andrew J. Murphy, PhD, Jiyuan Hu, PhD, Michael S. Garshick, MD, Yoscar Ogando, BS, Jianhua Liu, MD, Tomas Vaisar, PhD, Jay W. Heinecke, MD, Jeffrey S. Berger, MD, Ira J. Goldberg, MD, Edward A. Fisher, MD, PhD

**Supplementary Table 1.****Association between HbA1c (%) and WBCs in diabetic and control humans**

| Variable                   | Diabetic                 |                | Control                  |                |
|----------------------------|--------------------------|----------------|--------------------------|----------------|
|                            | <i>Beta</i><br>(95% CI)  | <i>p-value</i> | <i>Beta</i><br>(95% CI)  | <i>p-value</i> |
| Log HbA1c (%)              | 0.457<br>(0.103,0.811)   | 0.013          | 0.300<br>(-0.478,1.078)  | 0.452          |
| Sex (Male)                 | 0.011<br>(-0.139,0.162)  | 0.883          | 0.015<br>(-0.149,0.178)  | 0.859          |
| Log Age                    | -0.229<br>(-0.610,0.153) | 0.244          | -0.202<br>(-0.499,0.094) | 0.183          |
| Log BMI                    | 0.061<br>(-0.391,0.512)  | 0.793          | 0.064<br>(-0.299,0.427)  | 0.731          |
| Log Cholesterol            | 0.029<br>(-0.244,0.302)  | 0.837          | 0.003<br>(-0.137,0.144)  | 0.961          |
| Log LDL-C                  | 0.056<br>(-0.116,0.228)  | 0.524          | 0.088<br>(-0.061,0.238)  | 0.250          |
| Log Triglycerides<br>(Yes) | -0.017<br>(-0.148,0.115) | 0.804          | 0.124<br>(-0.002,0.250)  | 0.056          |
| Hypertension (Yes)         | 0.090<br>(-0.137,0.317)  | 0.440          | 0.100<br>(-0.041,0.241)  | 0.166          |

**Supplementary Table 2.****Association between HbA1c (%) and HDL-C in diabetic and control humans.**

| Variable                   | Diabetic                   |                | Control                  |                |
|----------------------------|----------------------------|----------------|--------------------------|----------------|
|                            | <i>Beta</i><br>(95% CI)    | <i>p-value</i> | <i>Beta</i><br>(95% CI)  | <i>p-value</i> |
| Log HbA1c (%)              | -0.417<br>(-0.780,-0.054)  | 0.030          | 0.500<br>(-3.132,4.132)  | 0.792          |
| Sex (Male)                 | -0.197<br>(-0.358,-0.036)  | 0.022          | -0.188<br>(-0.836,0.461) | 0.581          |
| Log Age                    | 0.301<br>(-0.187,0.789)    | 0.234          | 0.689<br>(-0.873,2.251)  | 0.403          |
| Log BMI                    | 0.039<br>(-0.392,0.470)    | 0.859          | 1.118<br>(-0.248,2.484)  | 0.133          |
| Log Cholesterol            | 0.364<br>(0.134,0.594)     | 0.004          | 0.001<br>(-0.184,0.186)  | 0.990          |
| Log LDL-C                  | 0.026<br>(-0.139,0.192)    | 0.757          | 0.295<br>(-0.137,0.727)  | 0.203          |
| Log Triglycerides<br>(Yes) | -0.180<br>(-0.367,0.006)   | 0.065          | -0.025<br>(-0.449,0.400) | 0.911          |
| Hypertension<br>(Yes)      | -4.6E-04<br>(-0.011,0.010) | 0.932          | 0.010<br>(-0.025,0.044)  | 0.595          |

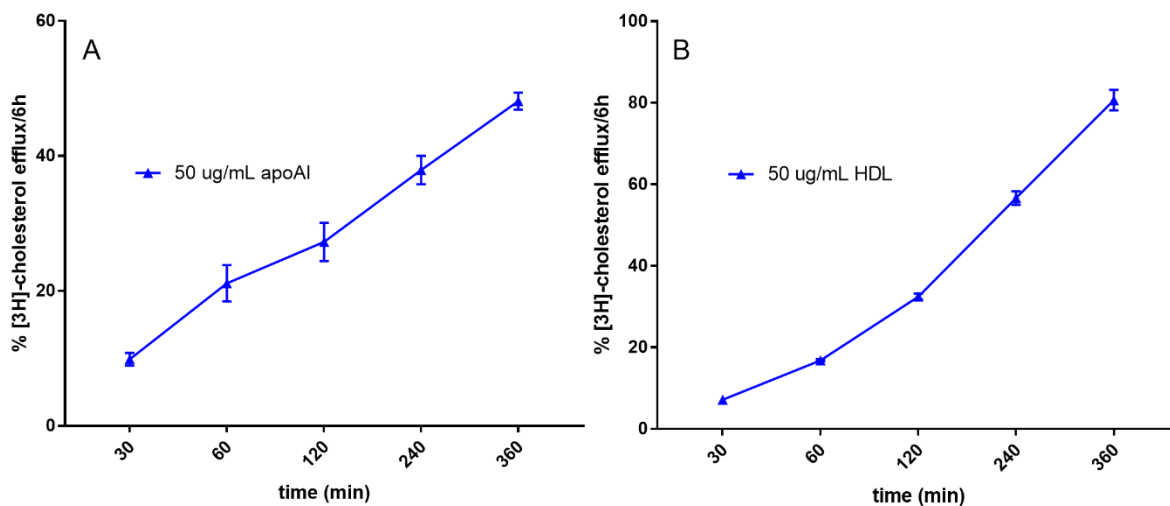

**Supplemental Figure 1.** Cholesterol efflux over time from monocyte progenitors in the presence of (A) apoA-I (50 ug/mL) and (B) HDL (50 ug/mL). Data are expressed as mean  $\pm$  SEM at each time point.

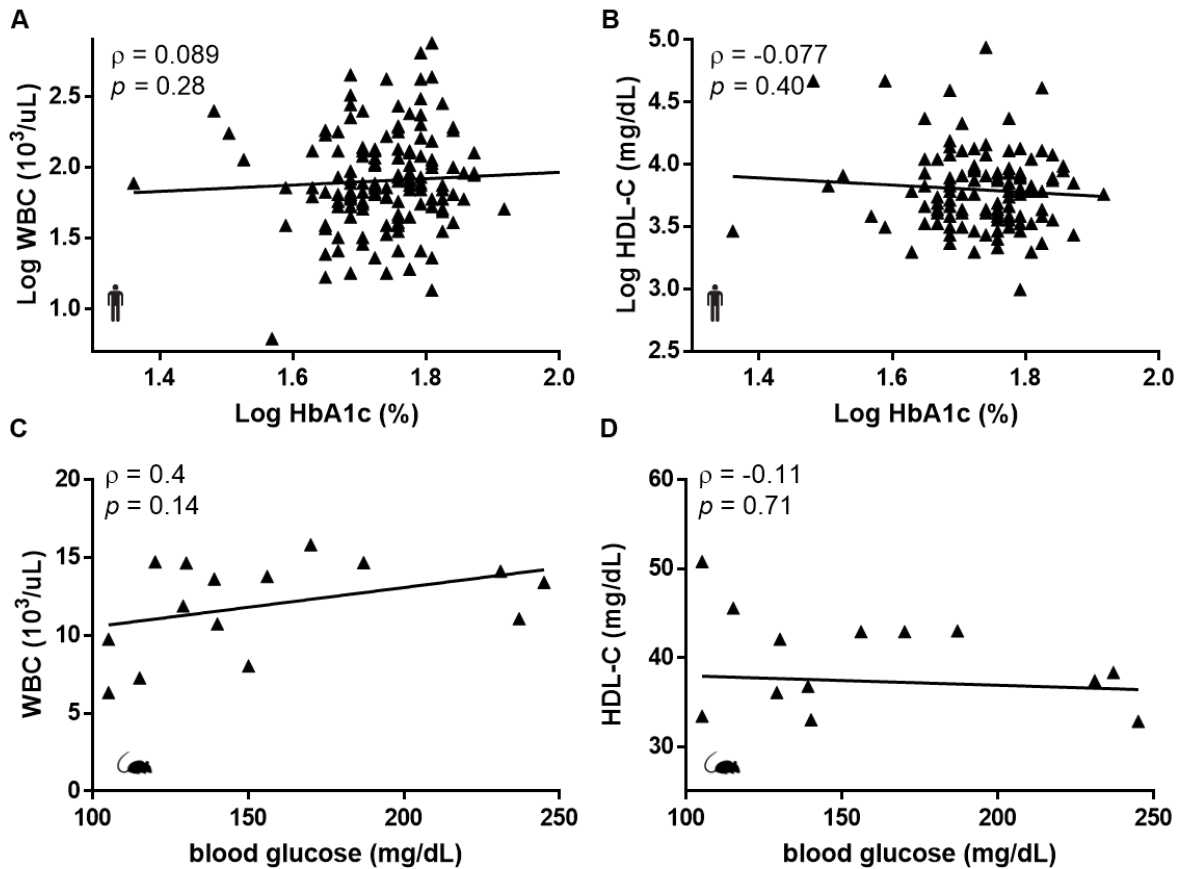

**Supplemental Figure 2. Hyperglycemia is not associated with white blood cell count or HDL-C in control humans and mice.** (A) White blood cells and (B) HDL-C do not associate with HbA1c in control humans ( $n=148$ ,  $n=122$ ). (C) White blood cells and (D) HDL-C do not associate with blood glucose in control mice ( $n=15$ ). Pearson's correlation coefficient ( $\rho$ ) and  $p$  values were assessed in R. Black triangles and line represent observations and regression line.

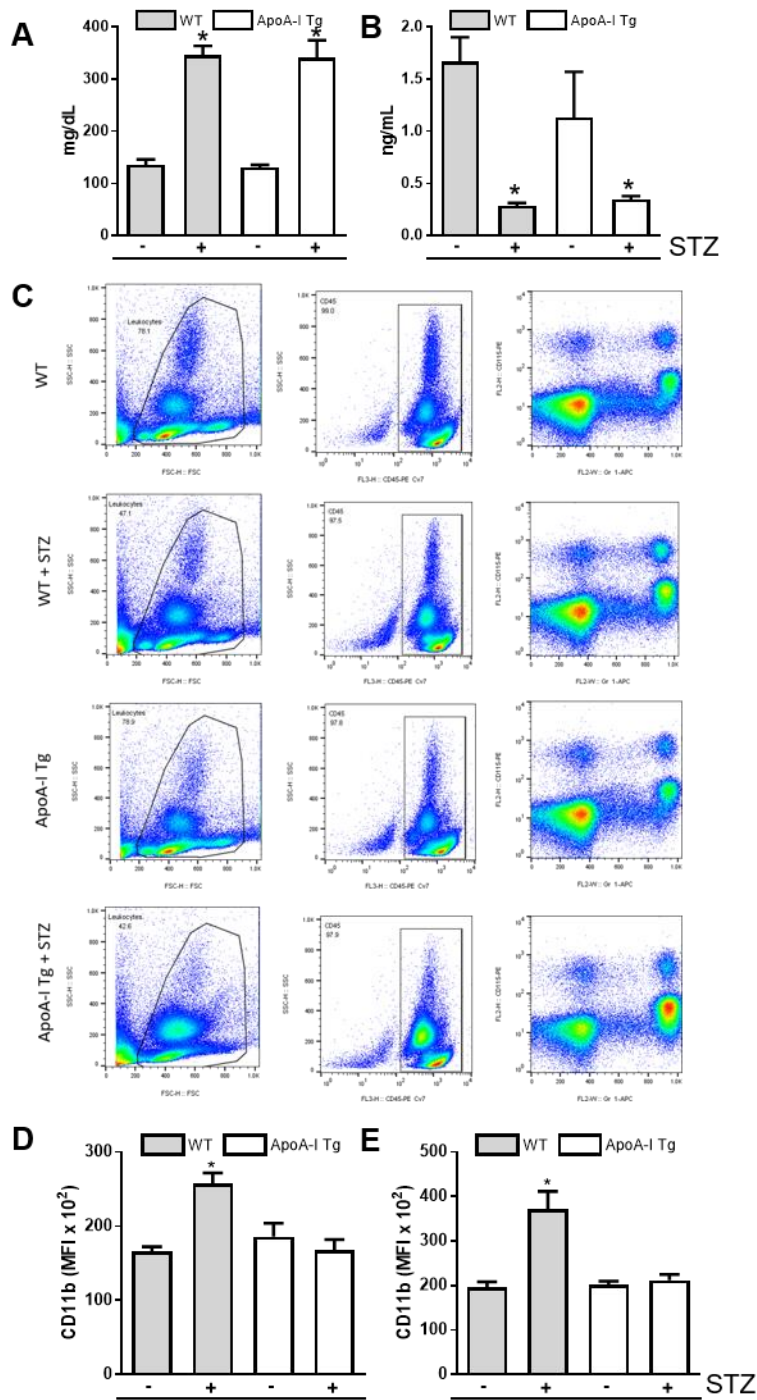

**Supplemental Figure 3.** (A) Blood glucose and (B) insulin levels in WT and apoA-I Tg control and diabetic mice. (C) Gating strategy for the identification of blood monocytes, plots correspond to data shown in Figure 2F. (D) Total monocyte and (E) Ly6C<sup>hi</sup> monocyte CD11b expression as determined by flow cytometry. In panels A, B, D & E, data are expressed as mean  $\pm$  SEM. (n=8-10/grp). \*  $p < 0.01$  compared to WT control group as determined via 2-way ANOVA and Tukey's post-hoc test.

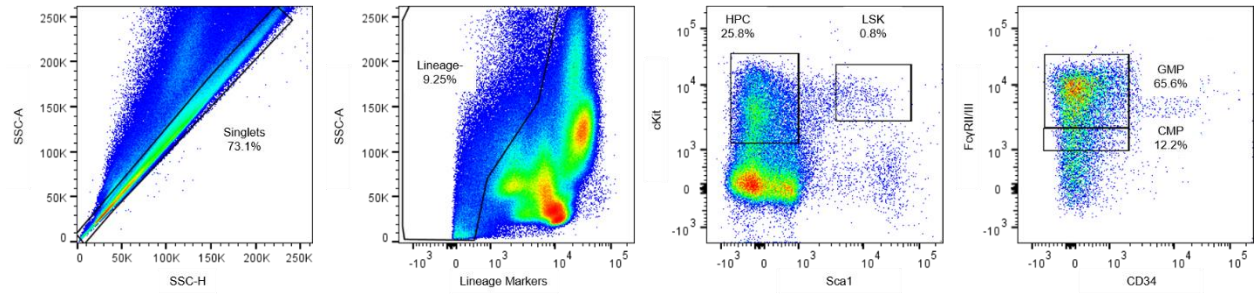

**Supplemental Figure 4.** Gating strategy for the identification of monocyte precursors within the bone marrow.

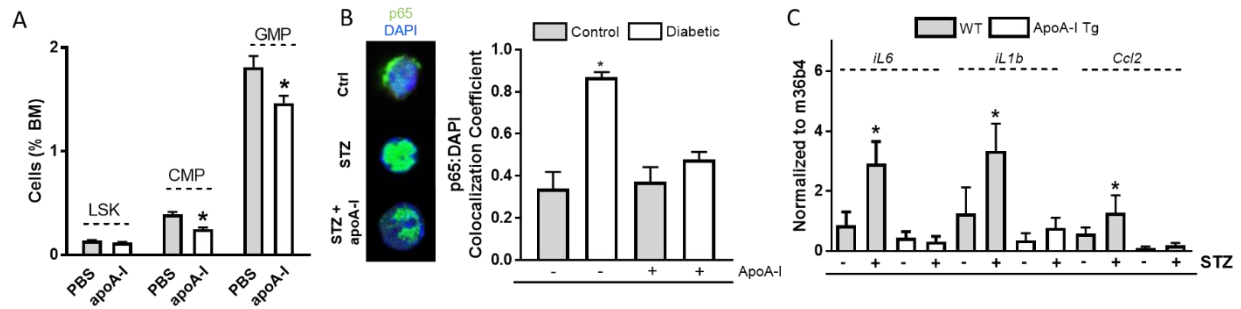

**Supplemental Figure 5.** (A) Quantification of LSKs, CMPs and GMPs in the bone marrow of diabetic WT mice who received saline or apoA-I injections (n=6 mice/grp). Data are expressed as mean  $\pm$  SEM. \*  $p < 0.0001$  determined by independent two-sample t-tests (two-tailed). (B) p65 staining of monocyte progenitors isolated from WT or STZ-treated mice and incubated with 50 ug/mL of apoA-I for 2 h. Cells were fixed and then stained for p65. Data represent progenitors pooled from 3 mice. The percentage co-localization of p65 and DAPI was calculated using the JACoP plug-in of ImageJ (NIH) after an appropriate threshold was established. (C) Transcript expression of NF $\kappa$ B targets in CMPs isolated from WT, diabetic WT, apoA-I Tg and apoA-I Tg diabetic mice (n=6 mice/grp). Data are expressed as mean  $\pm$  SEM. \*  $p < 0.01$  compared to WT control group as determined via 2-way ANOVA and Tukey's post-hoc test.



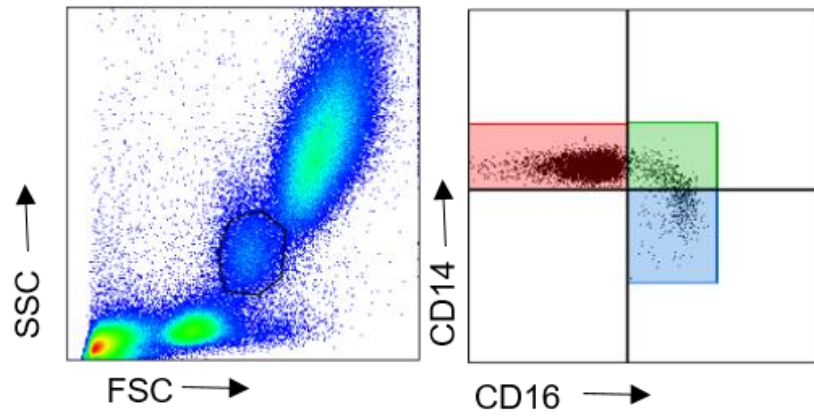

**Supplemental Figure 6.** Gating Strategy for the Identification of Human Monocyte Populations.

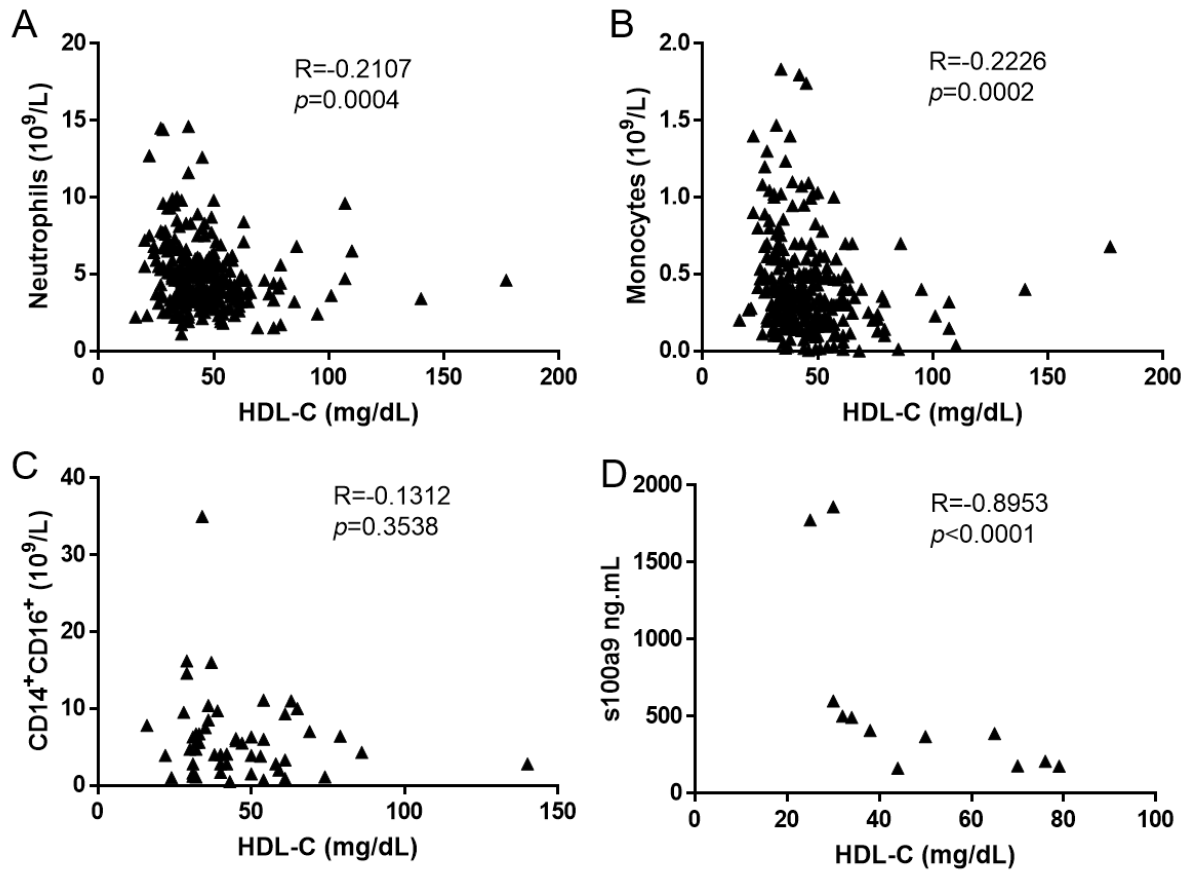

**Supplemental Figure 7.** HDL-C is negatively associated with leukocyte subsets and inflammation. (A) Neutrophil, and (B) monocyte counts correlated with HDL-C ( $n=336$ ,  $n=335$ ) and (C) CD14<sup>+</sup>CD16<sup>+</sup> monocyte populations correlated with HDL-C ( $n=52$ ). (D) Plasma S100A9 concentration as determined via ELISA ( $n=14$ ). Spearman's rank correlation coefficient (R) and  $p$  values were assessed and depicted in each panel.

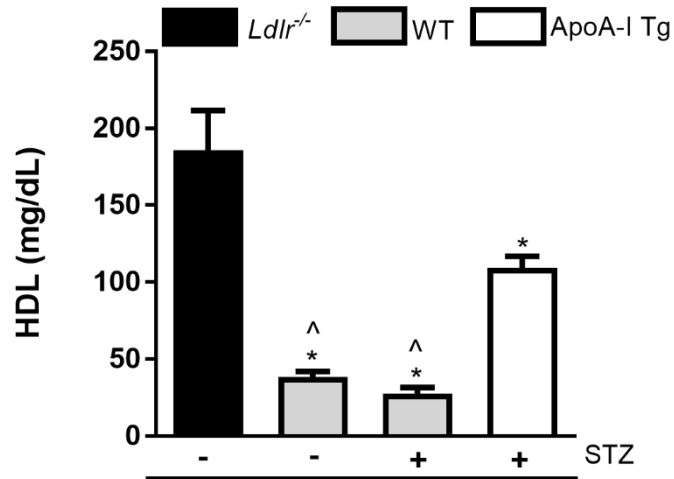

**Supplemental Figure 8.** HDL levels of mice in the regression study (n= 7-11 mice/grp). Data are expressed as mean  $\pm$  SEM. \*  $p < 0.01$  compared to the *Ldlr*<sup>-/-</sup> recipient group or ^  $p < 0.01$  compared to ApoA-I Tg diabetic recipient group as determined via 1-way ANOVA and Tukey's post-hoc test.
